# Supplementary material for: Liver-enriched Genes are Associated with the Prognosis of Patients with Hepatocellular Carcinoma
Source: PubMed Central journal article supplement (PMC6060164; doi:10.1038/s41598-018-29237-5), 2018-07-25

# Liver-enriched Genes are Associated with the Prognosis of Patients with Hepatocellular Carcinoma

Binghua Li<sup>1,\*</sup>, Tiancheng Xu<sup>1,\*</sup>, Chaohui Liu<sup>2</sup>, Gang Meng<sup>2</sup>, Yuchen Sun<sup>1</sup>, Liyuan Qian<sup>1</sup>,  
Shaohe Wang<sup>1</sup>, Jiwu Wei<sup>2</sup>, Decai Yu<sup>1</sup>, Yitao Ding<sup>1</sup>

<sup>1</sup> Department of Hepatobiliary Surgery, the Affiliated Drum Tower Hospital, Medical  
School of Nanjing University, Nanjing, 210093, China

<sup>2</sup> Jiangsu Key Laboratory of Molecular Medicine, Medical School of Nanjing University,  
Nanjing, 210093, China

\*These authors contributed equally to this study. Correspondence and requests for  
materials should be addressed to D.C.Y. (email: dryudecai@qq.com) or Y.T.D. (email:  
yitao\_ding@163.com)

**Figure S1. Expression pattern of liver-enriched genes.** Heatmap showing the expression patterns of liver-enriched genes in non-tumor tissue and tumor tissue in (A) GSE14520 and (C) GSE54236. Red indicates higher expression and blue indicates lower expression. Quantitative analysis of the expression patterns of liver-enriched genes in non-tumor and tumor tissues in (B) GSE14520 and (D) GSE54236. (E) Heatmap showing the internal correlation of the 188 liver-enriched genes based on Spearman's correlation coefficient. The color in the heatmap represents the Spearman's correlation coefficient. Red indicates positive correlation, and blue indicates negative correlation.

**Figure S2. Consensus clustering of liver-enriched genes in the TCGA and GEO datasets.** Consensus clustering matrix of liver-enriched genes for  $k=2$  to  $k=5$  of (A) TCGA, (D) GSE14520, and (G) GSE54236. Consensus clustering CDF for  $k=2$  to  $k=6$  of (B) TCGA, (E) GSE14520, and (H) GSE54236. (C) Mean expression values for liver-enriched genes of the patients in the different groups in (C) TCGA, (F) GSE14520, and (I) GSE54236.

**Figure S3. Time-dependent Brier score curves and ROC curves according to mean expression distance in the TCGA and GEO datasets.** The time-dependent Brier score curve of (A) the TCGA LIHC cohort (B) the GSE14520 dataset, and (C) the GSE54236 dataset. The time-dependent ROC curve of (D) the TCGA LIHC cohort (E) the GSE14520 dataset, and (F) the GSE54236 dataset.

**Table S1. The tissue-enriched gene list of 12 tissue types.**

A

LIHC patients(GSE14520)

liver-enriched genes

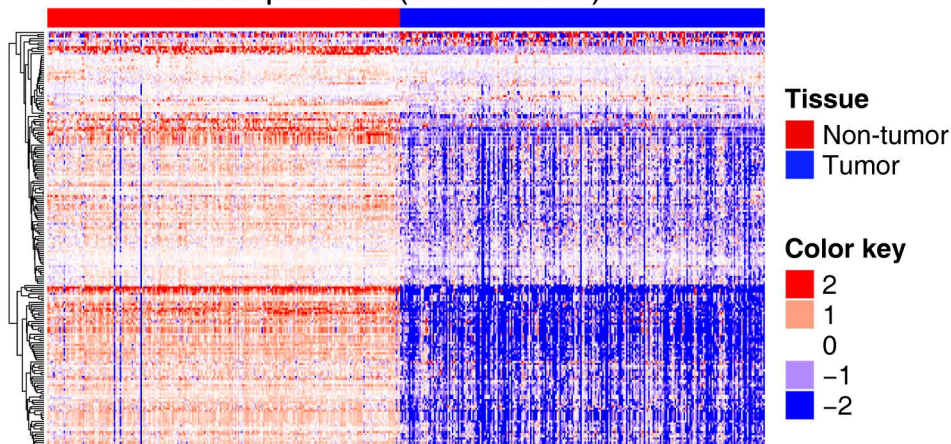

B

GSE14520  
Kruskal-Wallis Test :  $p < 0.0001$ 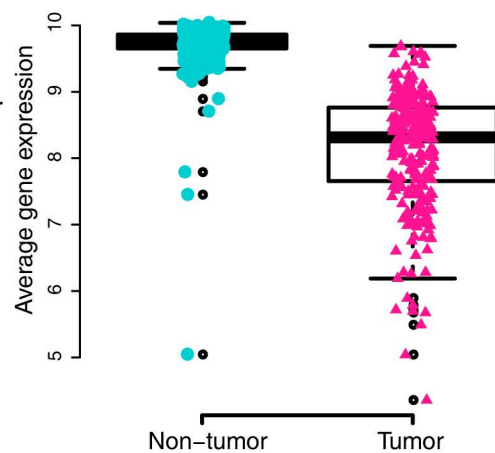

C

LIHC patients(GSE54236)

liver-enriched genes

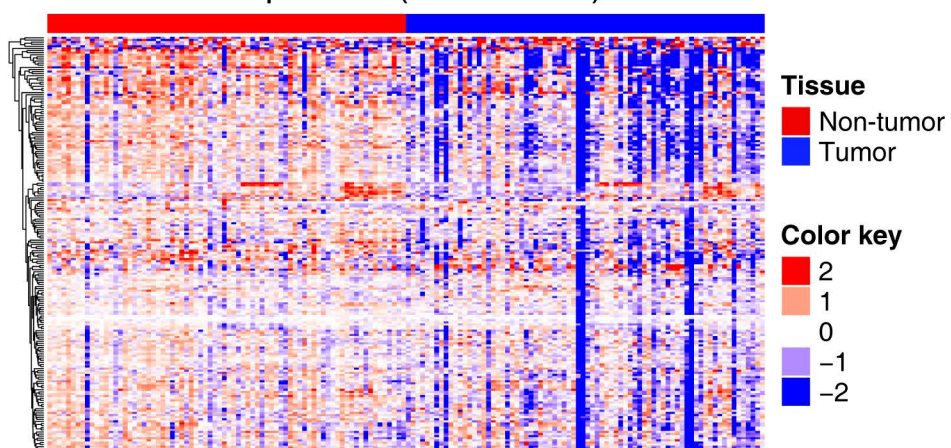

D

GSE54236  
Kruskal-Wallis Test :  $p < 0.0001$ 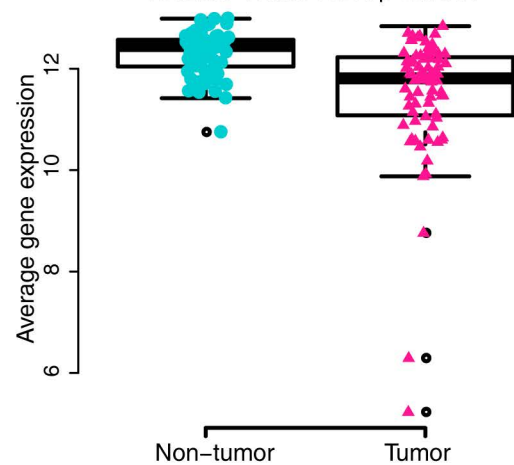

E

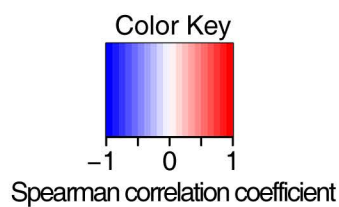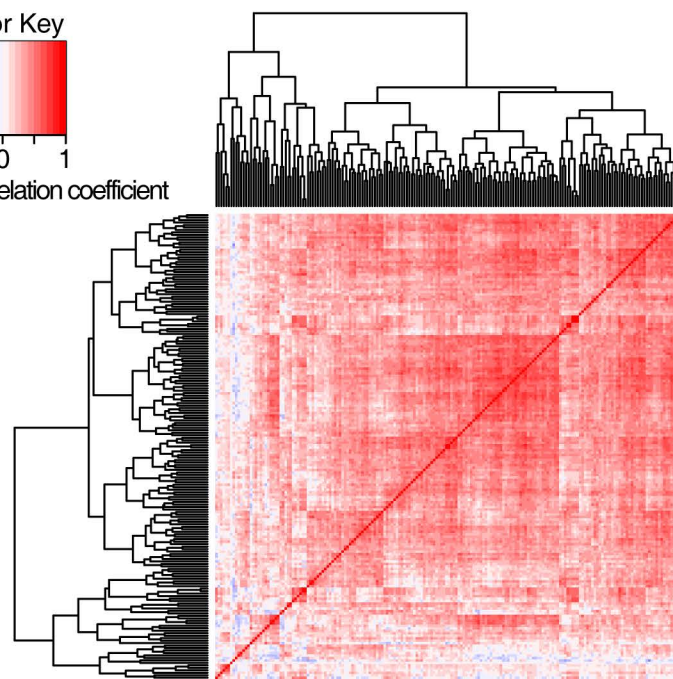

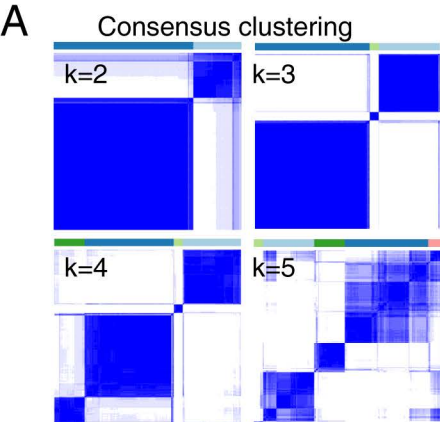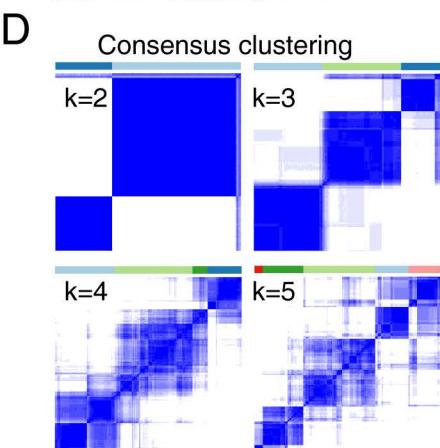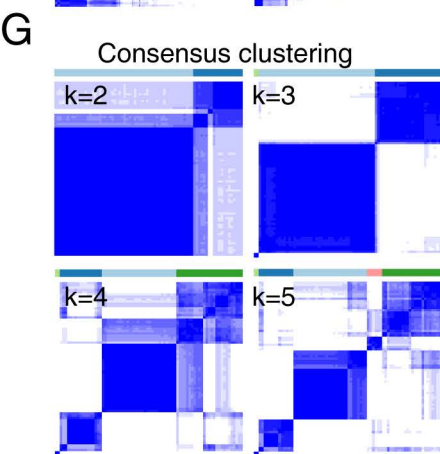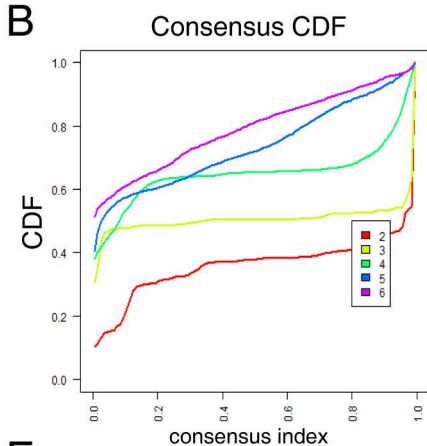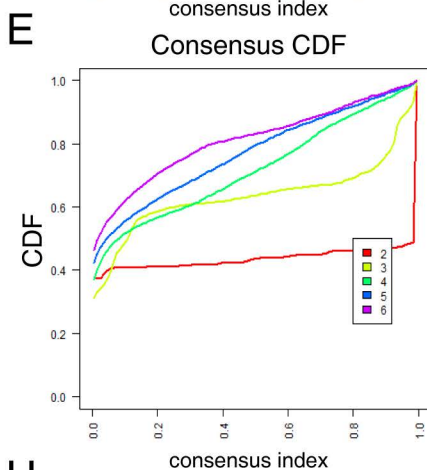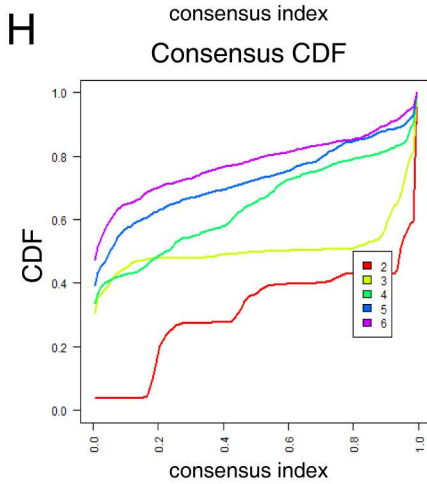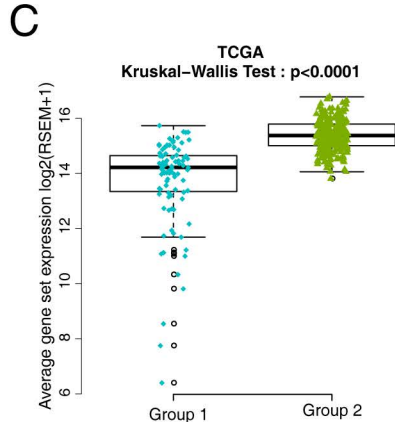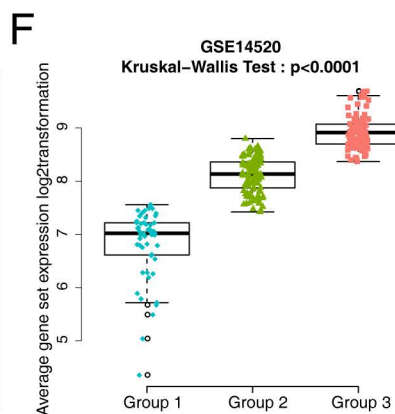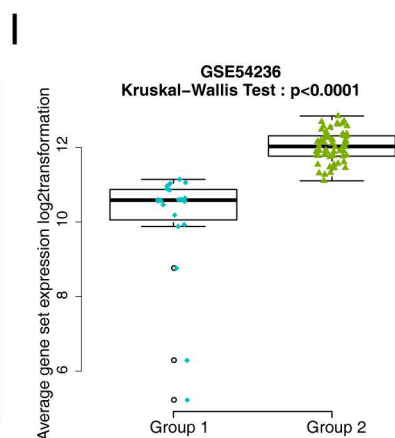

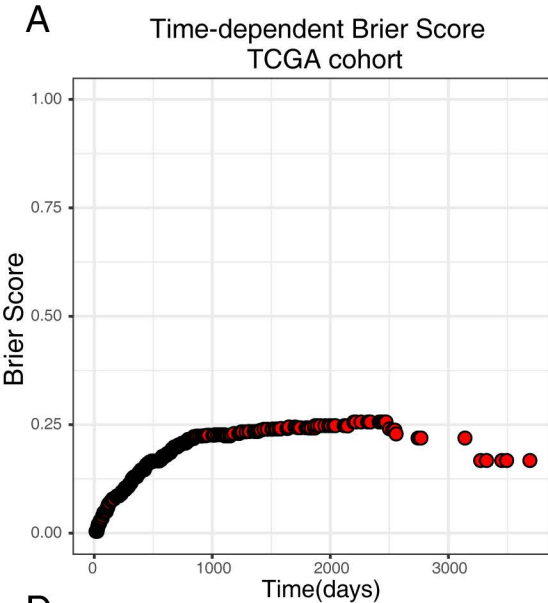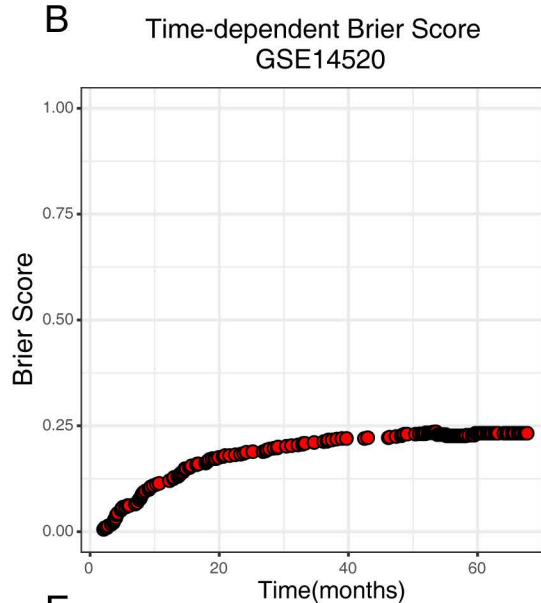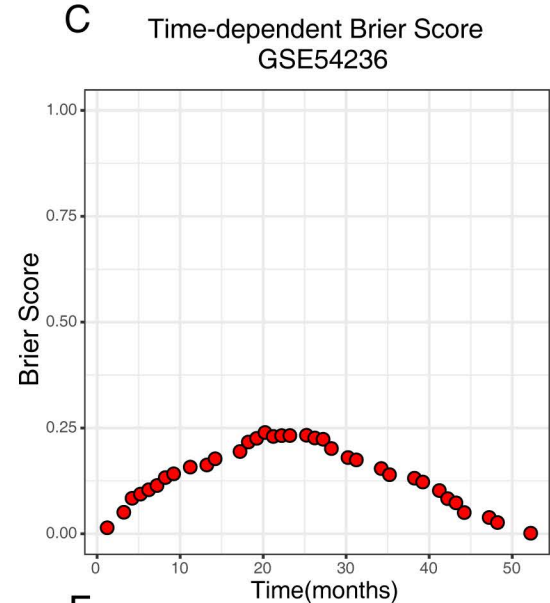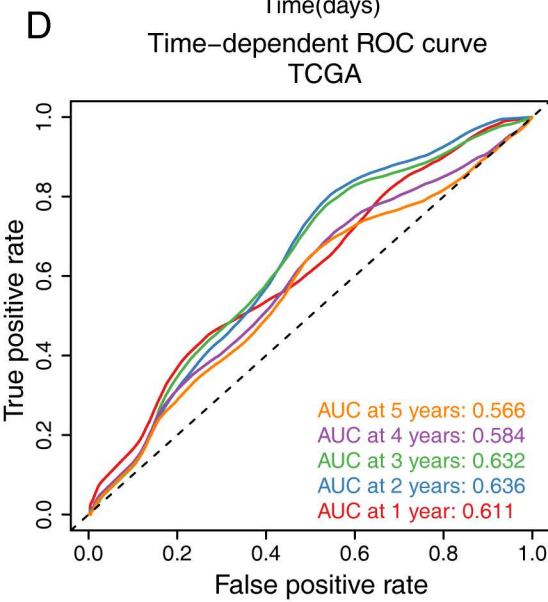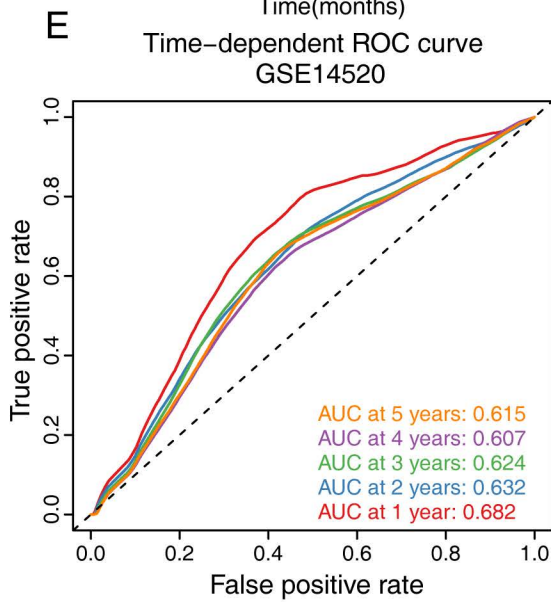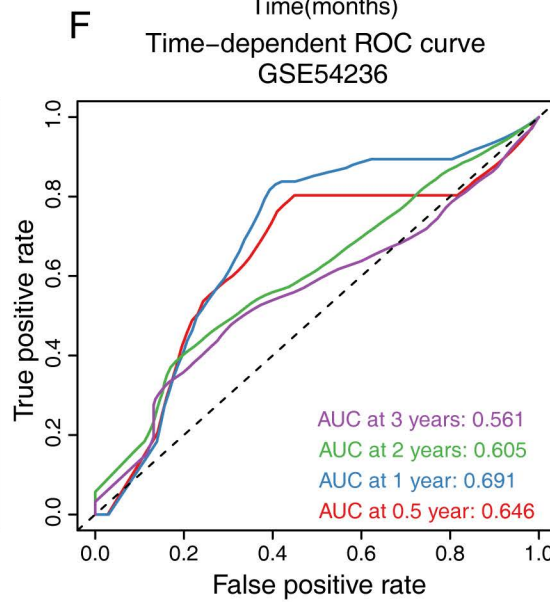

Supplement: 41598_2018_29237_MOESM2_ESM.pdf [file 41598_2018_29237_MOESM2_ESM.pdf]
